# Supplementary material for: Awareness of Biomedical Waste Management in Dental Students in Different Dental Colleges in Nepal
Source: Hindawi journal article supplement (doi:10.1155/2018/1742326), 2018-12-09
Supplement: f1 [file 1742326.f1.pdf]

3. Soiled dressings and used impression materials are disposed of in:  
a) Blue/white bags    b) Red bags    c) Black bags    d) Don't know
4. Used sharps and needles are disposed of in:  
a) Yellow bags                      b) Rigid/puncture-proof container  
c) Red bags                          d) Don't know
5. Extracted teeth and human tissue are disposed of in:  
a) Yellow bags              b) Red bags    c) Black bags    d) Don't know
6. Plaster of Paris is disposed of in:  
a) Yellow bags              b) Red bags    c) Black bags    d) Don't know
7. Excess mercury are disposed of in:  
a) Sink    b) Air tight Containers    c) Left on the tray    d) Don't know
8. Do you use protective barriers (e.g. gloves, masks) during handling of BMW?  
a) Yes    b) No
9. Do you treat infectious waste before disposing them?  
a) Yes    b) No

### **C. Participants education/awareness**

1. Can improper waste management cause various health hazards?  
a) Yes    b) No    c) Don't know
2. Is maintaining BMW records mandatory in your hospital/clinic?  
a) Yes    b) No    c) Don't know
3. Does your hospital/clinic generate biomedical waste?  
a) Yes    b) No    c) Don't know
4. Should there be regular educational programs on biomedical waste management?  
a) Yes    b) No    c) Don't know
5. Have you ever received training in any form (e.g. lecture, workshop) on BMW management?  
a) Yes    b) No
